# Supplementary material for: Association of First-Trimester Hepatic Steatosis Index with Maternal and Perinatal Outcomes: A Prospective Observational Study
Source: Research Square preprint supplement (doi:10.21203/rs.3.rs-8777734/v1), 2026-02-17
Supplement: Supplementary file 1 [file 1b3e664f63443983073f0016.docx]

**Table 1. Baseline characteristics according to hepatic steatosis index (HSI**).

| **Background characteristic** | **Category** | **HSI <36 (n=138)** | **HSI ≥ 36 (n=82)** | **p-value** |
| --- | --- | --- | --- | --- |
| **Age (years)** | <20 | 2 | 1 | 0.62 |
| 20-35 | 135 | 79 |
| ≥35 | 1 | 2 |
| **Parity** | Primiparous | 74(65.49%) | 39(34.51%) | 0.384 |
| Multiparous | 64(59.81%) | 43(40.19%) |
| **BMI (kg/m2)** | <18.5 | 4(100%) | 0(0%) | <0.001** |
| 18.5 – 24.9 | 80(97.5%) | 2(2.5%) |
| 25.0 – 29.9 | 74(68.5%) | 34(31.5%) |
| ≥30.0 | 0(0%) | 23(100%) |

Note: Values are n (row percentage). HSI <36 = non-elevated; HSI ≥ 36 = elevated. ** This denotes that p<0.05 and is highly statistically significant.p-values from Pearson’s chi-square test

**Table 2. Maternal and Neonatal Outcomes According to HSI Status**

| **Maternal Outcomes** | | | | |
| --- | --- | --- | --- | --- |
| **Outcome** | **Category** | **HSI <36 (n=138)** | **HSI ≥ 36 (n=82)** | **p-value** |
| **Gestational diabetes mellitus** | No | 118(67.82%) | 56(32.18%) | 0.002* |
| Yes | 20(43.48%) | 26(56.52%) |
| **Hypertensive disorders of pregnancy** | No | 130(64.68%) | 71(35.32%) | 0.052 |
| Yes | 8(42.11%) | 11(57.89%) |
| **Mode of delivery** | Vaginal | 98(64.90%) | 53(35.10%) | 0.324 |
| Caesarean | 40(57.97%) | 29(42.03%) |
| **Neonatal Outcomes** | | | | |
| **Foetal growth restriction** | No | 134(63.81%) | 76(36.19%) | 0.128 |
| Yes | 4(40.00%) | 6(60.00%) |
| **Birth weight** | <2.5 kg | 9(50.00%) | 9(50.00%) | 0.113 |
| 2.5-3.5 kg | 122(65.59%) | 64(34.41%) |
| <3.5 kg | 7(43.75%) | 9(56.25%) |
| **Gestational age at birth** | Preterm | 4(66.67%) | 2(33.33%) | 0.737 |
| Term | 134(62.62%) | 80(37.38%) |
| **NICU admission** | No | 6(50.00%) | 6(50.00%) | 0.370 |
| Yes | 135(36.4%) | 76(36.6%) |

Note: * This denotes that p<0.05 and is statistically significant

**Table 3. Logistic Regression Analysis of HSI Status and Adverse Maternal Outcomes**

| **Outcome** | **Unadjusted OR (95% CI)** | **P-value** | **Adjusted ORa (95% CI)** | **p-value** |
| --- | --- | --- | --- | --- |
| **Gestational diabetes mellitus** | 2.74 (1.41– 5.32) | 0.003* | 2.72(1.09 – 6.80) | 0.032* |
| **Hypertensive disorders of pregnancy** | 2.52 (0.97– 6.55) | 0.058 | 3.06 (0.76 – 12.29) | 0.116 |
| **Composite adverse maternal outcome b** | 2.93 (1.60 – 5.35) | <0.001** | 2.96 (1.28 – 6.85) | 0.011* |

Note: a Adjusted for maternal age, BMI, and parity. b Composite outcome defined as gestational diabetes mellitus and/or hypertensive disorders of pregnancy. * This denotes that p<0.05 and is statistically significant. ** This denotes that p<0.05 and is highly statistically significant.

**Table 4. Logistic Regression Analysis of HSI Status and Adverse Neonatal Outcomes**

| **Outcome** | **Unadjusted OR (95% CI)** | **P-value** | **Adjusted ORa (95% CI)** | **p-value** |
| --- | --- | --- | --- | --- |
| **Foetal growth restriction** | 2.64 (0.72– 9.67) | 0.141 | 6.99 (1.01– 48.50) | 0.049* |
| **Low birth weight (<2.5kg)** | 1.77(0.67 – 4.65) | 0.249 | 3.10 (0.77 – 12.51) | 0.112 |

Note: a Adjusted for maternal age, BMI, and parity. * This denotes that p<0.05 and is statistically significant
